# Supplementary material for: Replacement of Palm Oil with Soybean Acid Oil in Broiler Chicken Diet: Fat Digestibility and Lipid Class Content along the Intestinal Tract
Source: MDPI journal article supplement (doi:10.3390/ani11092586), 2021-09-03
Supplement: s1 [file s1]

**Table S1.** Lipid-class content<sup>1</sup> according to different intestinal segments and excreta in 11- and 35-day-old broiler chickens.

| Item                               | Intestinal Segment and Excreta <sup>2</sup> |                    |                    |                    |                    | p-Values |        |
|------------------------------------|---------------------------------------------|--------------------|--------------------|--------------------|--------------------|----------|--------|
|                                    | Upper Jejunum                               | Lower Jejunum      | Upper Ileum        | Lower Ileum        | Excreta            | SEM      | P      |
| <b>11-day-old broiler chickens</b> |                                             |                    |                    |                    |                    |          |        |
| TAG                                | 0.57 <sup>a</sup>                           | 0.41 <sup>b</sup>  | 0.29 <sup>b</sup>  | 0.31 <sup>b</sup>  | 0.38 <sup>b</sup>  | 0.039    | <0.001 |
| DAG                                | 2.12 <sup>a</sup>                           | 0.89 <sup>b</sup>  | 0.65 <sup>b</sup>  | 0.61 <sup>b</sup>  | 0.96 <sup>b</sup>  | 0.103    | <0.001 |
| MAG                                | 0.25                                        | 0.30               | 0.26               | 0.34               | 0.30               | 0.025    | 0.104  |
| FFA                                | 13.46 <sup>a</sup>                          | 6.23 <sup>b</sup>  | 5.40 <sup>b</sup>  | 5.22 <sup>b</sup>  | 6.82 <sup>b</sup>  | 0.677    | <0.001 |
| <b>35-day-old broiler chickens</b> |                                             |                    |                    |                    |                    |          |        |
| TAG                                | 0.24 <sup>a</sup>                           | 0.22 <sup>ab</sup> | 0.16 <sup>bc</sup> | 0.11 <sup>c</sup>  | 0.17 <sup>bc</sup> | 0.016    | <0.001 |
| DAG                                | 1.47 <sup>a</sup>                           | 0.52 <sup>b</sup>  | 0.19 <sup>c</sup>  | 0.17 <sup>c</sup>  | 0.16 <sup>c</sup>  | 0.042    | <0.001 |
| MAG                                | 0.27 <sup>a</sup>                           | 0.22 <sup>ab</sup> | 0.15 <sup>c</sup>  | 0.18 <sup>bc</sup> | 0.15 <sup>c</sup>  | 0.016    | <0.001 |
| FFA                                | 7.96 <sup>a</sup>                           | 3.82 <sup>b</sup>  | 1.80 <sup>c</sup>  | 1.63 <sup>c</sup>  | 1.67 <sup>c</sup>  | 0.210    | <0.001 |

<sup>1</sup> Lipid-class concentration (mg/g)/Ti concentration (mg/g). <sup>2</sup>Values are pooled means of 30 replicates from chickens fed diets at 11-day-old ( $n = 150$ ) or 35-day-old ( $n = 150$ ). TAG = triacylglycerols; DAG = diacylglycerols; MAG = monoacylglycerols; FFA = free fatty acids. SEM = standard error of the mean.  $p$ -Values were obtained from univariate ANOVA conducted for each age to study whether the intestinal segment (or excreta) affected the lipid-class content. a-c: means in a row not sharing a common letter are significantly different ( $p < 0.05$ ).

**Table S2.** Lipid-class content in the lower ileum according to different fat sources in the diet in 11- and 35-day-old broiler chickens.

| Item | Dietary Treatments <sup>1</sup> |        |        |      |      |                             |        |        |      |      |       |        |        |        |        |        |       |        |       |        |
|------|---------------------------------|--------|--------|------|------|-----------------------------|--------|--------|------|------|-------|--------|--------|--------|--------|--------|-------|--------|-------|--------|
|      | 11-day-old broiler chickens     |        |        |      |      | 35-day-old broiler chickens |        |        |      |      | P6    |        | P4-SA2 |        | P2-SA4 |        | SA6   |        | S6    |        |
|      | P6                              | P4-SA2 | P2-SA4 | SA6  | S6   | P6                          | P4-SA2 | P2-SA4 | SA6  | S6   | P6    |        | P4-SA2 |        | P2-SA4 |        | SA6   |        | S6    |        |
|      |                                 |        |        |      |      |                             |        |        |      |      | SEM   | P      | SEM    | P      | SEM    | P      | SEM   | P      | SEM   | P      |
| TAG  | 0.19                            | 0.30   | 0.36   | 0.38 | 0.32 | 0.07                        | 0.11   | 0.15   | 0.18 | 0.09 | 0.021 | 0.002  | 0.019  | <0.001 | 0.037  | 0.002  | 0.052 | 0.012  | 0.020 | <0.001 |
| DAG  | 0.45                            | 0.58   | 0.72   | 0.68 | 0.64 | 0.17                        | 0.16   | 0.17   | 0.22 | 0.14 | 0.071 | 0.021  | 0.045  | <0.001 | 0.058  | <0.001 | 0.070 | <0.001 | 0.069 | <0.001 |
| MAG  | 0.15                            | 0.35   | 0.45   | 0.52 | 0.23 | 0.15                        | 0.17   | 0.18   | 0.24 | 0.13 | 0.019 | 1.000  | 0.023  | <0.001 | 0.027  | <0.001 | 0.047 | 0.002  | 0.014 | <0.001 |
| FFA  | 8.47                            | 6.83   | 4.63   | 3.17 | 3.02 | 2.92                        | 1.62   | 1.33   | 1.40 | 0.87 | 0.574 | <0.001 | 0.298  | <0.001 | 0.278  | <0.001 | 0.208 | <0.001 | 0.252 | <0.001 |

<sup>1</sup>Values are pooled means of 6 replicates from chickens fed diets supplemented with 6% of palm oil (P), soybean acid oil (SA), soybean oil (S), or oil blends with 4% palm oil and 2% soybean acid oil (P4-SA2) or 2% palm oil and 4% soybean acid oil (P2-SA4). TAG = triacylglycerols; DAG = diacylglycerols; MAG = monoacylglycerols; FFA = free fatty acids. SEM = standard error of the mean. P = *p*-values, that were obtained from univariate ANOVA conducted for each dietary treatment to study whether the age affected the lipid-class content (*n* = 12). *p* < 0.05 was considered significant.

**Table S3.** Feed apparent metabolizable energy value and apparent fatty-acid digestibility coefficients in the lower ileum according to different fat sources in the diet in 11- and 35-day-old broiler chickens.

| Item                      | Dietary Treatments <sup>1</sup> |        |        |      |      |                             |        |        |      |      |       |        |        |        |        |        |       |        |       |        |
|---------------------------|---------------------------------|--------|--------|------|------|-----------------------------|--------|--------|------|------|-------|--------|--------|--------|--------|--------|-------|--------|-------|--------|
|                           | 11-day-old broiler chickens     |        |        |      |      | 35-day-old broiler chickens |        |        |      |      |       |        |        |        |        |        |       |        |       |        |
|                           | P6                              | P4-SA2 | P2-SA4 | SA6  | S6   | P6                          | P4-SA2 | P2-SA4 | SA6  | S6   | P6    |        | P4-SA2 |        | P2-SA4 |        | SA6   |        | S6    |        |
|                           | SEM                             | P      | SEM    | P    | SEM  | P                           | SEM    | P      | SEM  | P    | SEM   | P      | SEM    | P      | SEM    | P      | SEM   | P      | SEM   | P      |
| AME, kcal/kg <sup>2</sup> | 3014                            | 3109   | 3001   | 3119 | 3348 | 3279                        | 3324   | 3384   | 3274 | 3364 | 31.27 | <0.001 | 26.57  | <0.001 | 20.32  | <0.001 | 24.26 | 0.001  | 24.64 | 0.656  |
| <i>FA digestibility</i>   |                                 |        |        |      |      |                             |        |        |      |      |       |        |        |        |        |        |       |        |       |        |
| TFA                       | 0.62                            | 0.65   | 0.72   | 0.80 | 0.79 | 0.84                        | 0.88   | 0.91   | 0.91 | 0.92 | 0.022 | <0.001 | 0.016  | <0.001 | 0.019  | <0.001 | 0.017 | <0.001 | 0.011 | <0.001 |
| SFA                       | 0.49                            | 0.46   | 0.51   | 0.55 | 0.69 | 0.78                        | 0.85   | 0.89   | 0.85 | 0.90 | 0.026 | <0.001 | 0.021  | <0.001 | 0.034  | <0.001 | 0.028 | <0.001 | 0.011 | <0.001 |
| MUFA                      | 0.74                            | 0.70   | 0.73   | 0.75 | 0.76 | 0.93                        | 0.92   | 0.91   | 0.90 | 0.93 | 0.026 | <0.001 | 0.017  | <0.001 | 0.024  | <0.001 | 0.022 | <0.001 | 0.010 | <0.001 |
| PUFA                      | 0.75                            | 0.81   | 0.85   | 0.90 | 0.83 | 0.83                        | 0.88   | 0.92   | 0.93 | 0.93 | 0.028 | 0.056  | 0.013  | 0.002  | 0.017  | 0.014  | 0.016 | 0.234  | 0.011 | <0.001 |

<sup>1</sup>Values are pooled means of 6 replicates from chickens fed diets supplemented with 6% of palm oil (P), soybean acid oil (SA), soybean oil (S), or oil blends with 4% palm oil and 2% soybean acid oil (P4-SA2) or 2% palm oil and 4% soybean acid oil (P2-SA4). AME = apparent metabolizable energy, TFA = total fatty acids, SFA = saturated fatty acids, MUFA = monounsaturated fatty acids, PUFA = polyunsaturated fatty acids, SEM = standard error of the mean. P = *p*-values, that were obtained from univariate ANOVA conducted for each dietary treatment to study whether the age affected the feed AME values, and the FA digestibility results (*n* = 12). *p* < 0.05 was considered significant.

**Table S4.** Contribution of each intestinal segment to FA absorption according to the age of the chicken.

|                      | Age (days) <sup>1</sup> |       |       |                 |
|----------------------|-------------------------|-------|-------|-----------------|
| Item                 | 11                      | 35    | SEM   | <i>p</i> -Value |
| <b>Upper jejunum</b> |                         |       |       |                 |
| TFA                  | 54.96                   | 49.83 | 4.198 | 0.347           |
| Palmitic             | 34.24                   | 49.36 | 4.736 | 0.019           |
| Stearic              | -                       | -     | -     | -               |
| Oleic                | 47.89                   | 64.45 | 3.731 | 0.002           |
| Linoleic             | 54.93                   | 44.55 | 4.999 | 0.124           |
| <b>Lower jejunum</b> |                         |       |       |                 |
| TFA                  | 42.50                   | 33.04 | 4.347 | 0.117           |
| Palmitic             | 51.40                   | 34.38 | 4.286 | 0.005           |
| Stearic              | 58.31                   | 59.05 | 4.160 | 0.896           |
| Oleic                | 40.16                   | 24.26 | 3.448 | 0.001           |
| Linoleic             | 41.80                   | 33.51 | 4.697 | 0.206           |
| <b>Upper ileum</b>   |                         |       |       |                 |
| TFA                  | 7.03                    | 13.01 | 2.296 | 0.064           |
| Palmitic             | 8.67                    | 11.92 | 2.277 | 0.300           |
| Stearic              | 16.17                   | 27.34 | 2.880 | 0.007           |
| Oleic                | 9.01                    | 8.40  | 2.248 | 0.844           |
| Linoleic             | 6.08                    | 17.09 | 1.575 | <0.001          |
| <b>Lower ileum</b>   |                         |       |       |                 |
| TFA                  | 10.02                   | 4.11  | 0.720 | <0.001          |
| Palmitic             | 10.76                   | 4.34  | 1.045 | <0.001          |
| Stearic              | 26.25                   | 9.93  | 2.859 | <0.001          |
| Oleic                | 9.17                    | 2.89  | 0.871 | <0.001          |
| Linoleic             | 8.39                    | 4.84  | 0.790 | 0.002           |

<sup>1</sup>Values are means of 30 replicates from chickens fed diets at 11-day-old or 35-day-old. TFA = total fatty acids. SEM = standard error of the mean. *p*-Values were obtained from univariate ANOVA conducted for each intestinal segment to study whether the age affected the FA absorption (*n* = 60). *p* < 0.05 was considered significant.
